# Supplementary material for: Cardiomyocyte glucagon receptor signaling modulates outcomes in mice with experimental myocardial infarction
Source: PubMed Central journal article supplement — Mol Metab. 2014 Nov 29;4(2):132–43. doi: 10.1016/j.molmet.2014.11.005 (PMC4314543; doi:10.1016/j.molmet.2014.11.005), 2014-11-29
Supplement: mmc1.pdf [file mmc1.pdf]

A

*Glp1r**Gipr*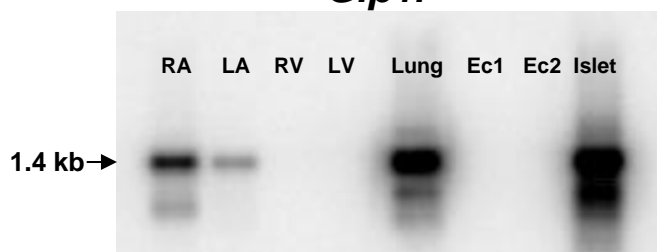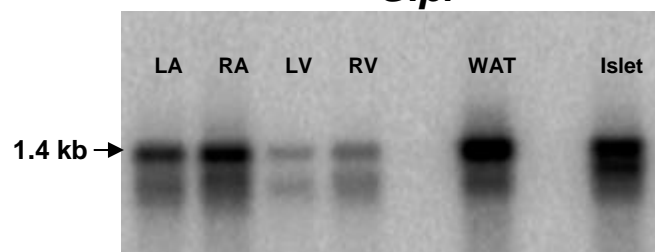*Gcgr**Glp2r*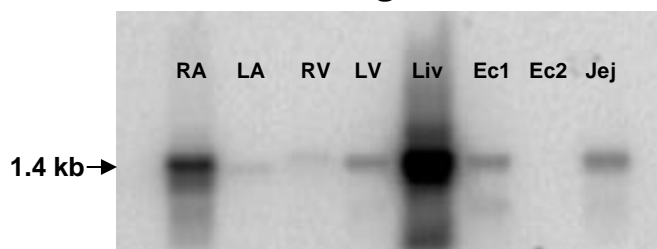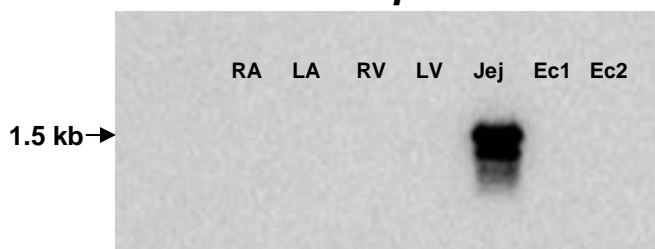

## B Atria and Ventricle mRNA Levels

B

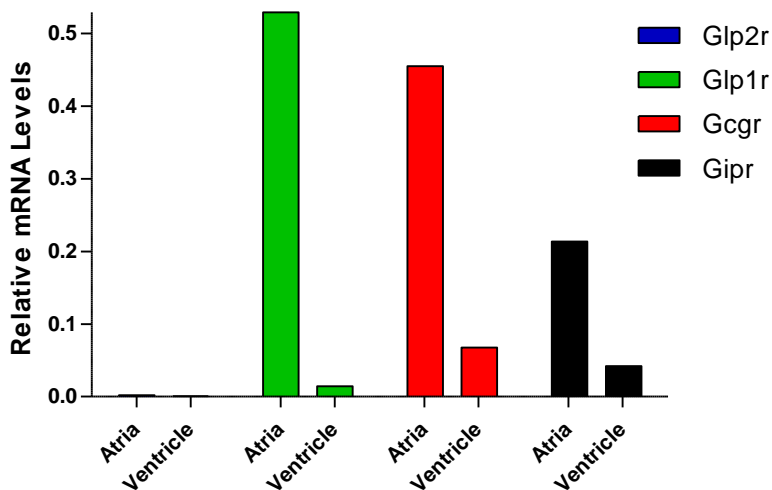

C

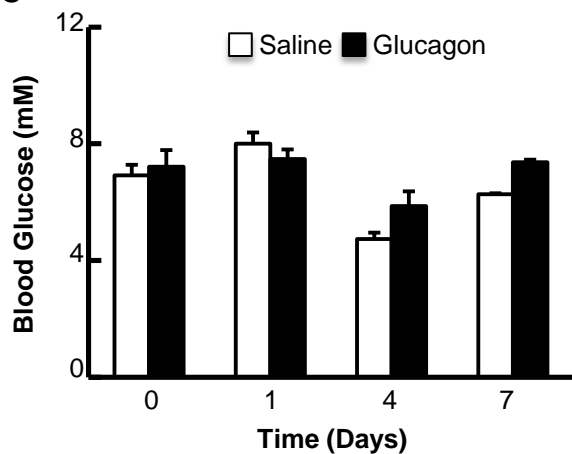

D

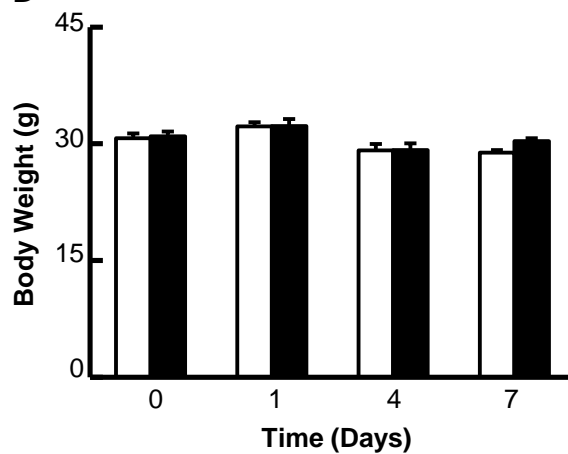

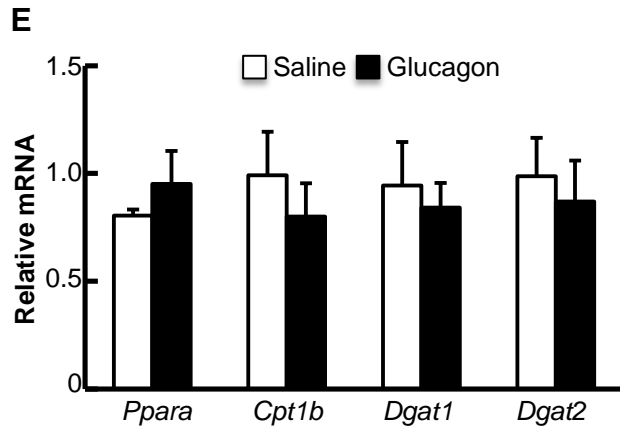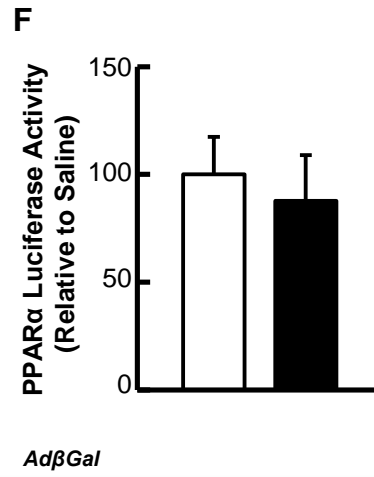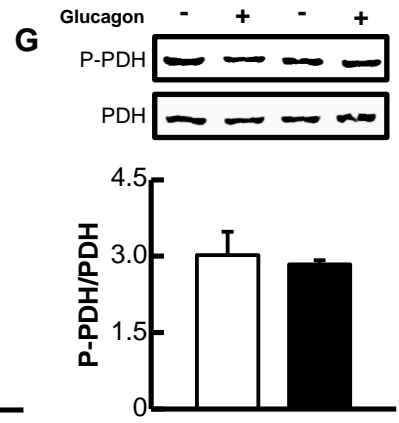

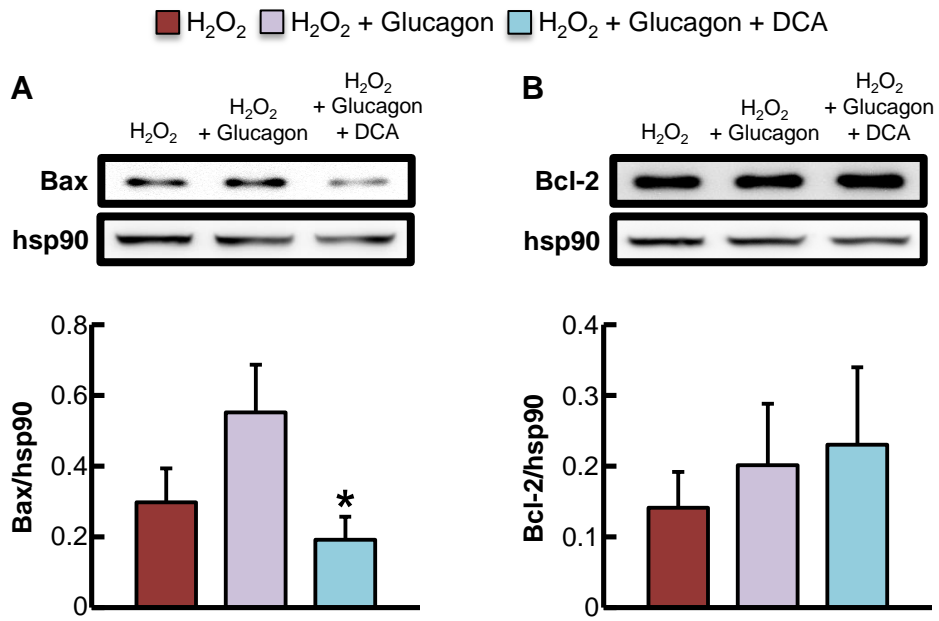

□ Saline ■ Glucagon

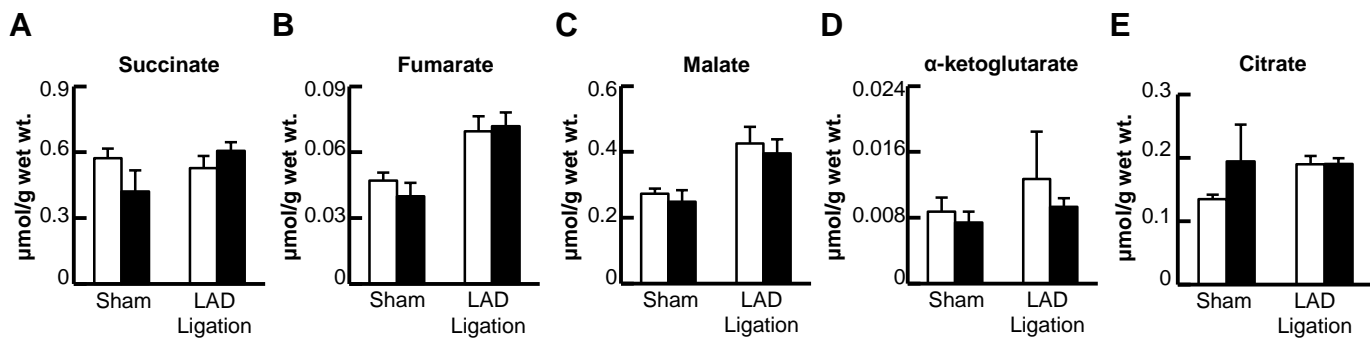

A

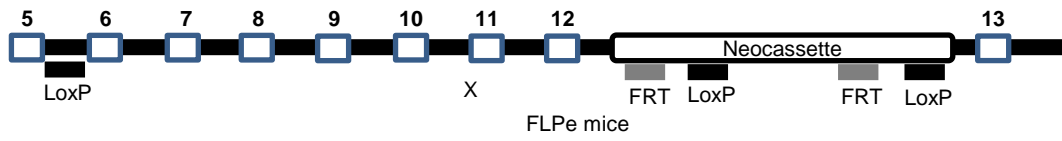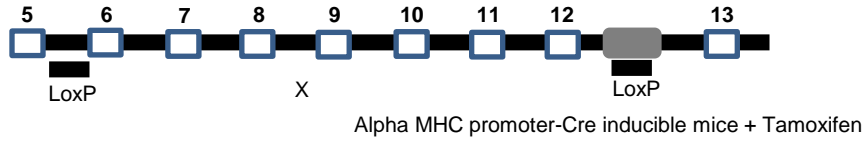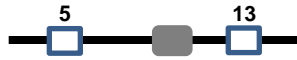

■ *Gcgr*<sup>Flox</sup> ■ *αMHC*<sup>Cre</sup> ■ *Gcgr*<sup>CM-/-</sup>

B

*Liver Gcgr*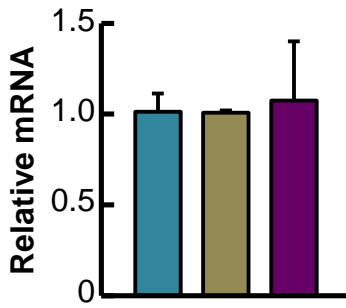

C

*Kidney Gcgr*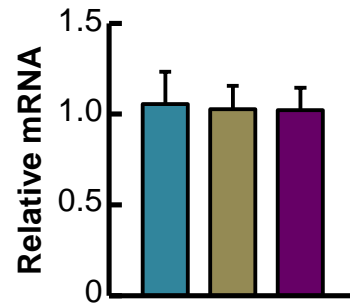

D

*Heart Gcgr*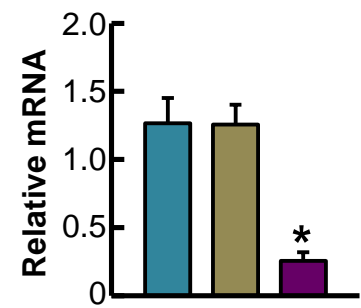

WT
  *Gcgr*<sup>Flox</sup>  
  *$\alpha$ MHC*<sup>Cre</sup>
 *Gcgr*<sup>CM-/-</sup>

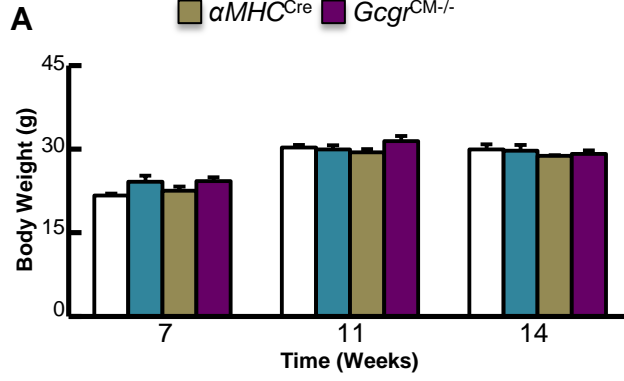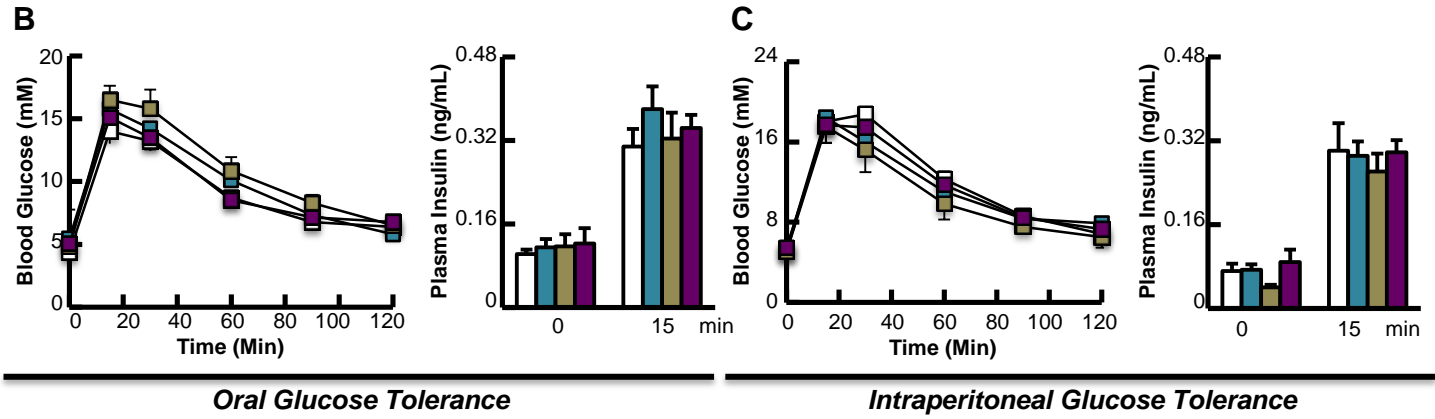

$\alpha$ MHC<sup>Cre</sup>  $Gcgr^{CM-/-}$

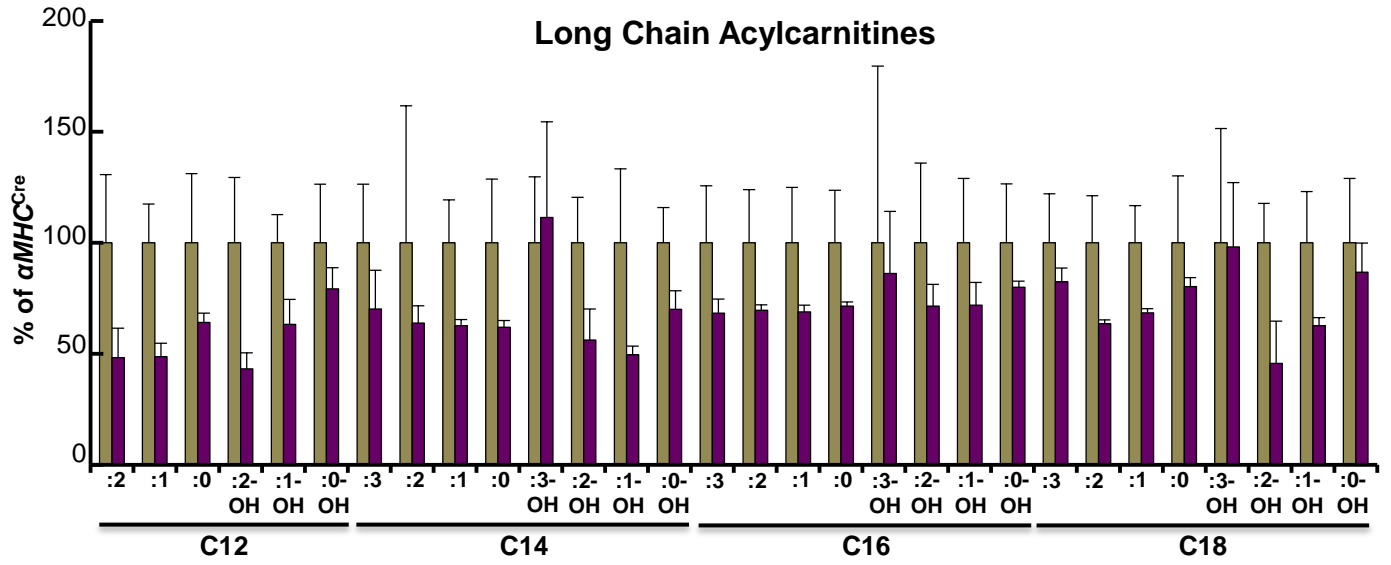

Sham (Aerobic) Hearts from Mice Fed a High Fat Diet (45% Kcal) for 6 Months
